# Supplementary material for: A novel electrochemical method based on screen-printed electrodes and magnetic beads for detection of trinucleotide repeat sequence d(CAG)n
Source: Royal Society of Chemistry journal article supplement (doi:10.1039/c8nj00443a), 2018-01-01
Supplement: c8nj00443a1.pdf [file c8nj00443a1.pdf]

## Supporting Information For

### **A novel Electrochemical method based on screen-printed electrode and magnetic beads for trinucleotide repeat sequence d(CAG)<sub>n</sub>**

Yalan Liu (b), Jiao Li (b), Gang Chang (c), Ruizhi Zhu (a) \*, Hanping He (b) \*,  
Xiuhua Zhang (b), Shengfu Wang (b)

a, Key Laboratory of Tobacco Chemistry of Yunnan Province, R&D Center of China  
Tobacco Yunnan Industrial Co., Ltd., China

b, Hubei Collaborative Innovation Center for Advanced Organic Chemical Materials;  
Ministry of Education Key Laboratory for the Synthesis and Application of Organic  
Functional Molecules, Hubei University, Youyi Road 368, Wuchang, Wuhan, Hubei  
430062, (PR China).

c, School of Materials Science and Engineering, Hubei University, Youyi Road 368,  
Wuchang, Wuhan, Hubei 430062, (PR China).

---

\* Corresponding author, Tel: +86-15827220426; fax: +86-027-88663043.

E-mail addresses: hehanping@hubu.edu.cn., 190793945@qq.com

| samples | Added (CAG) <sub>15</sub> /nM | Founded (CAG) <sub>15</sub> /nM | RSD% | Recovery% |
|---------|-------------------------------|---------------------------------|------|-----------|
| 1       | 1                             | 1.11                            | 6.4  | 111       |
| 2       | 10                            | 9.79                            | 5.8  | 97.9      |
| 3       | 100                           | 82.05                           | 2.9  | 82.1      |

**Table.S1** Detection of different concentrations (CAG)<sub>15</sub> added in human serum (n =

| samples | Added (CAG) <sub>n</sub> | Founded (CAG) <sub>n</sub> | RSD% | Recovery% |
|---------|--------------------------|----------------------------|------|-----------|
| 1       | 15                       | 15.98                      | 6.4  | 107       |
| 2       | 25                       | 23.13                      | 7.2  | 92.5      |
| 3       | 35                       | 36.31                      | 4.6  | 104       |

3)

**Table.S2** Detection different repeat number of CAG trinucleotide repeats(10 nM) added in human serum (n = 3)

| Name                 | Sequences (5'-3')                                                          |
|----------------------|----------------------------------------------------------------------------|
| NH <sub>2</sub> -DNA | NH <sub>2</sub> -(CH <sub>2</sub> ) <sub>6</sub> -TTTTTTTTTTAGCGATAGCGTGTG |
| Fc-DNA               | CTGCTGCTGCTGCTGTTTTTT-ferrocene                                            |
| T-DNA                | (CAGCAGCAGCAGCAG) <sub>3</sub> GCTATCGCT                                   |
| (CAG) <sub>10</sub>  | (CAGCAGCAGCAGCAG) <sub>2</sub> GCTATCGCT                                   |
| (CAG) <sub>20</sub>  | (CAGCAGCAGCAGCAG) <sub>4</sub> GCTATCGCT                                   |
| (CAG) <sub>25</sub>  | (CAGCAGCAGCAGCAG) <sub>5</sub> GCTATCGCT                                   |
| (CAG) <sub>30</sub>  | (CAGCAGCAGCAGCAG) <sub>6</sub> GCTATCGCT                                   |
| (CAG) <sub>35</sub>  | (CAGCAGCAGCAGCAG) <sub>7</sub> GCTATCGCT                                   |
| (CCG) <sub>15</sub>  | (CCGCCGCCGCCGCCG) <sub>3</sub> GCTATCGCT                                   |
| (CTG) <sub>15</sub>  | (CTGCTGCTGCTGCTG) <sub>3</sub> GCTATCGCT                                   |
| (ATT) <sub>15</sub>  | (ATTATTATTATTATT) <sub>3</sub> GCTATCGCT                                   |
| (TGG) <sub>15</sub>  | (TGGTGGTGGTGGTGG) <sub>3</sub> GCTATCGCT                                   |
| (GAA) <sub>15</sub>  | (GAAGAAGAAGAAGAA) <sub>3</sub> GCTATCGCT                                   |
| (CGG) <sub>15</sub>  | (CGGCGGCGGCGGCGG) <sub>3</sub> GCTATCGCT                                   |

**Table.S3** The DNA sequences in the experiment.

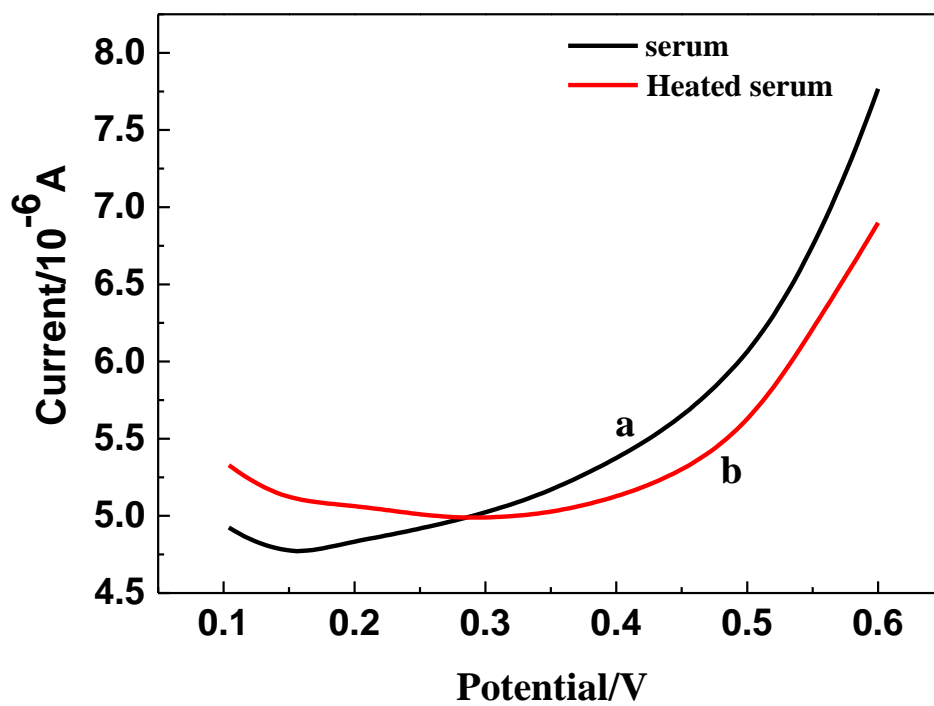

**Figure.S1** (a) SWV curve of the electrode 100-fold-diluted serum; (b) SWV curve of the electrode 100-fold-diluted serum was heated at 90 °C for 5 min
